# Supplementary material for: Increased death and exhaustion of CD69high T cells and NK cells are associated with PD-1 antibody application in the in vitro co-culture system
Source: PeerJ journal article supplement (doi:10.7717/peerj.15374), 2023-05-08
Supplement: Supplemental_Figure.zip [file Supplementary Figure 1.docx]

**Supplementary Figure 1**


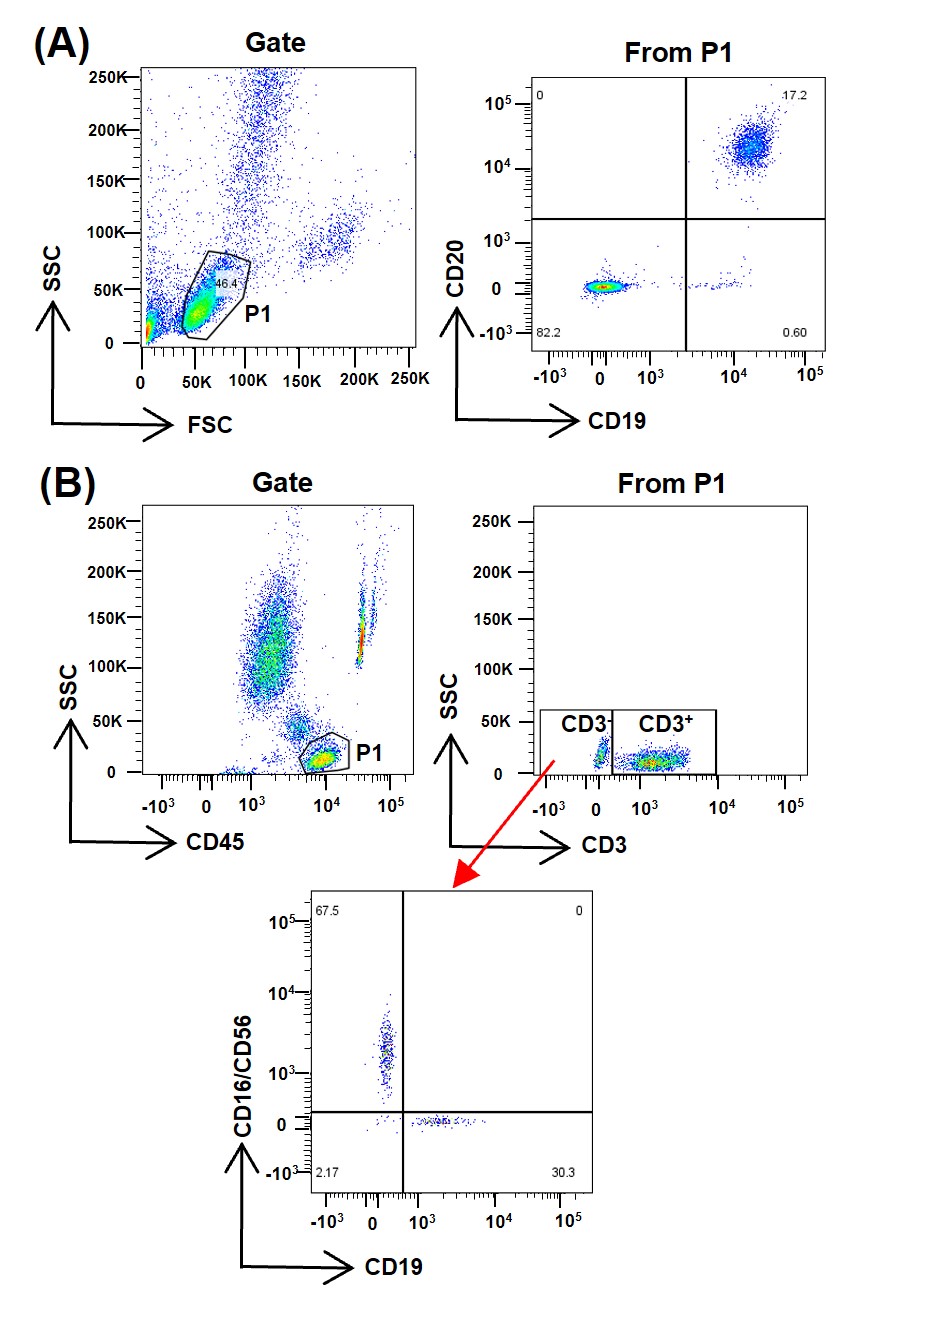


**Supplementary Figure 1. The equivalence analysis of alternative markers or criteria.** (A) The similarity of CD19+ B cells and CD20+ B cells were analyzed in peripheral blood leukocytes by flow cytometry. P1 gates peripheral lymphocytes. (B) The similarity of CD45+CD3-CD19- cells and CD45+CD3-CD56+/CD16+ NK cells were analyzed in peripheral blood leukocytes by flow cytometry.
