# Supplementary material for: Increased death and exhaustion of CD69high T cells and NK cells are associated with PD-1 antibody application in the in vitro co-culture system
Source: PeerJ journal article supplement (doi:10.7717/peerj.15374), 2023-05-08
Supplement: Supplemental_Figure.zip [file Supplementary Figure 3.docx]

**Supplementary Figure 3**


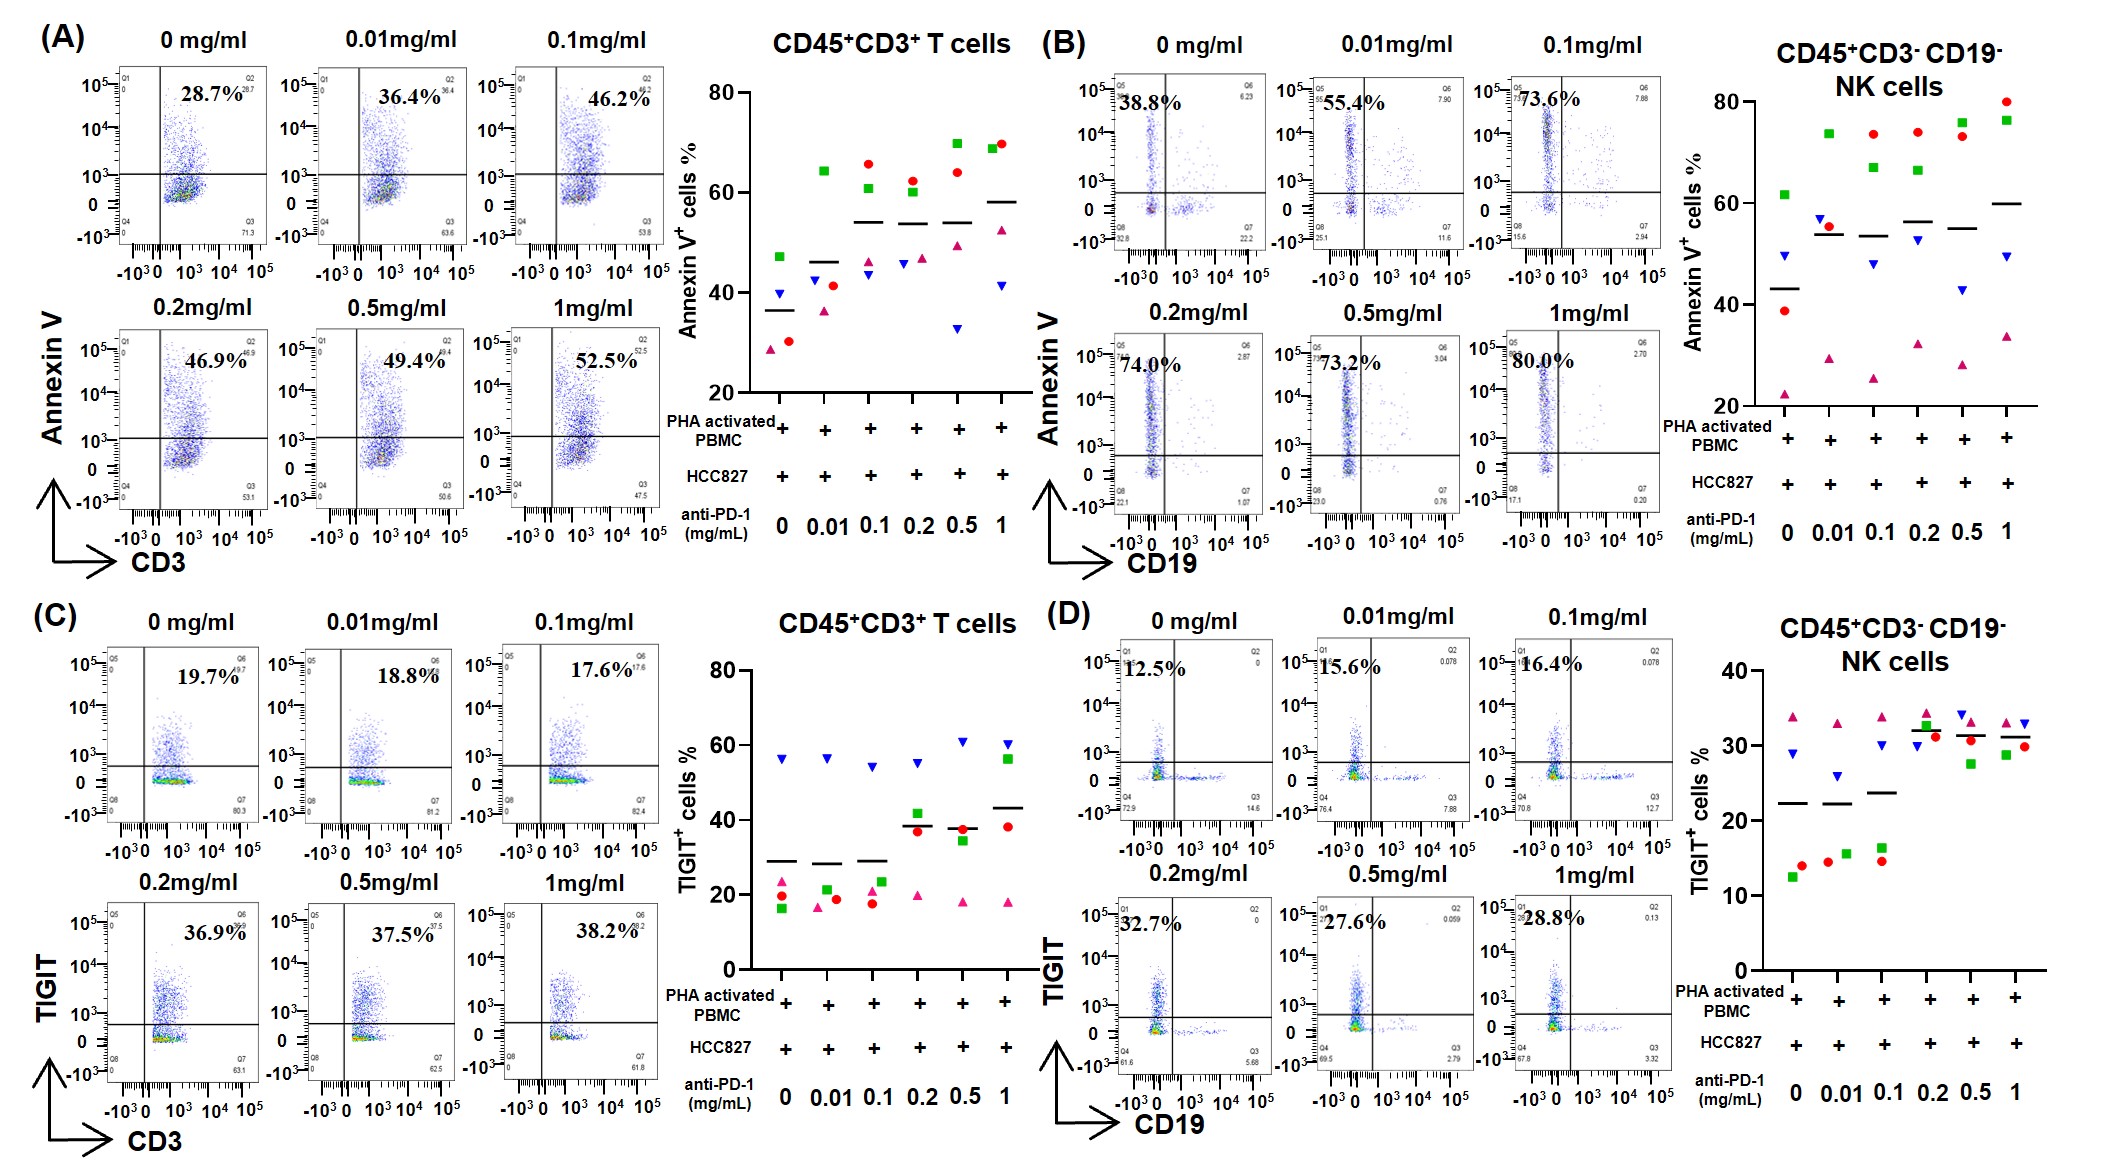


**Supplementary Figure 3. Effects of PD-1 mAb on the death and exhaustion of the PHA activated T cells and NK cells derived from healthy volunteers.** PBMCs were isolated from peripheral blood of four healthy volunteers and treated with 2ug/ml PHA for 24 hours. After washing, they were inoculated into HCC827 cell culture wells in a ratio of 2:1. The gradient increasing concentration of PD-1 mAb were respectively added into co-culture system containing PHA activated PBMCs and HCC827 cells. Flow cytometry analyzed the proportions of (A) CD45+CD3+Annexin V+ T cells and (B) CD45+CD3-CD19-Annexin V+ NK cells in different groups. Proportions of (C) CD45+CD3+TIGIT+ T cells and (D) CD45+CD3-CD19-TIGIT+ NK cells in different groups. The same shape comes from the same source.
