# Supplementary material for: Increased death and exhaustion of CD69high T cells and NK cells are associated with PD-1 antibody application in the in vitro co-culture system
Source: PeerJ journal article supplement (doi:10.7717/peerj.15374), 2023-05-08
Supplement: Supplemental_Figure.zip [file Supplementary Figure 4.docx]

**Supplementary Figure 4**


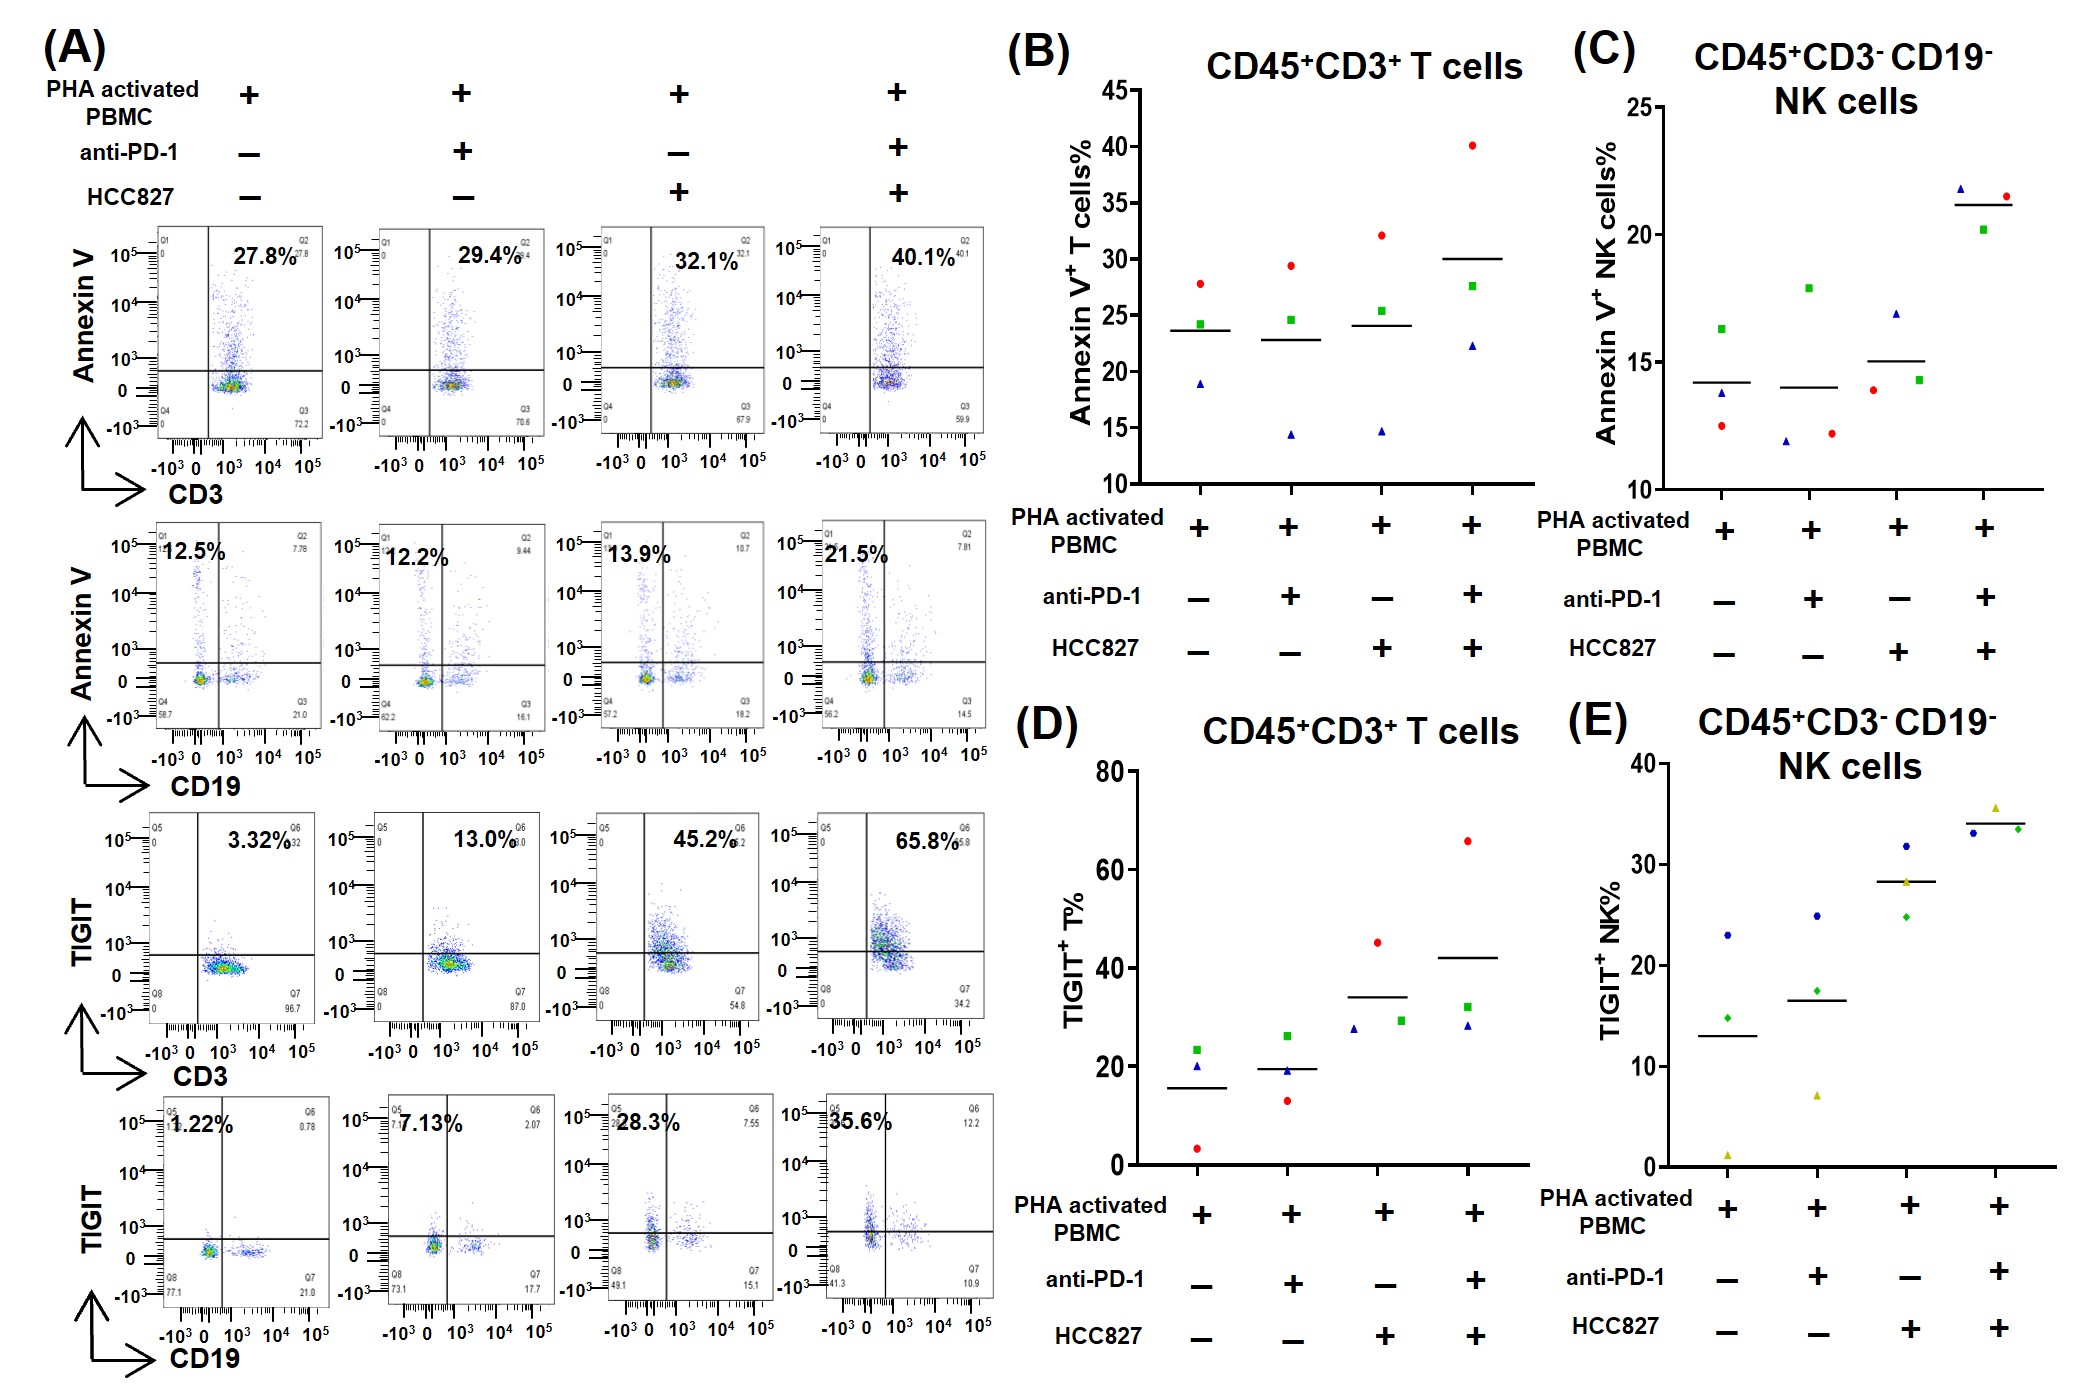


**Supplementary Figure 4. Effects of PD-1 mAb on the death and exhaustion of the activated T cells and NK cells when PBMCs cultured alone or co-cultured with tumor cells.** (A) Flow-cytometry dot plots show the expression of Annexin V and TIGIT on CD45+CD3+ T cells and CD45+CD3-CD19-Annexin V+ NK cells in different groups. (B-E) Analyzing the percentages of Annexin V+ and TIGIT+ on the PHA activated T and NK cells in different groups. Experiments depicted are representative of 3 performed. The same shape comes from the same source.
